# Supplementary material
Source: Springer Nature journal article supplement (https://www.springermedizin.de/resource/supplementary/13017_2008_99_MOESM3_ESM.pdf/9635466)

HB

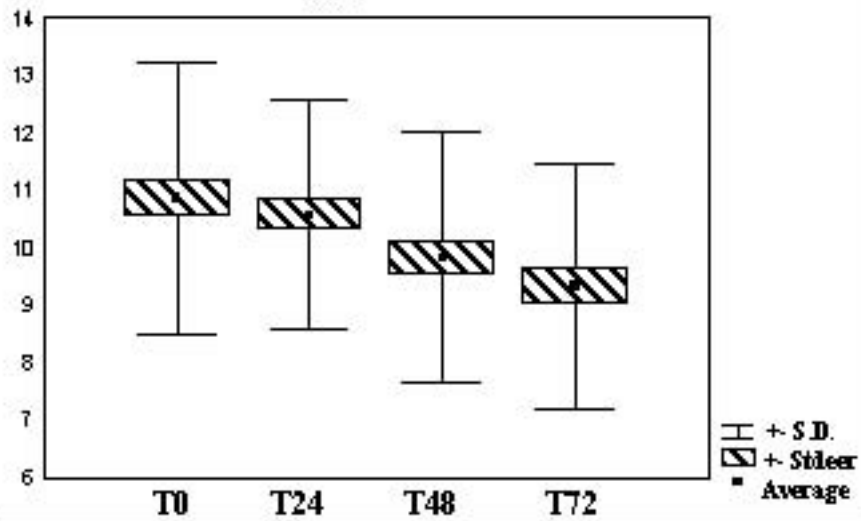

VG

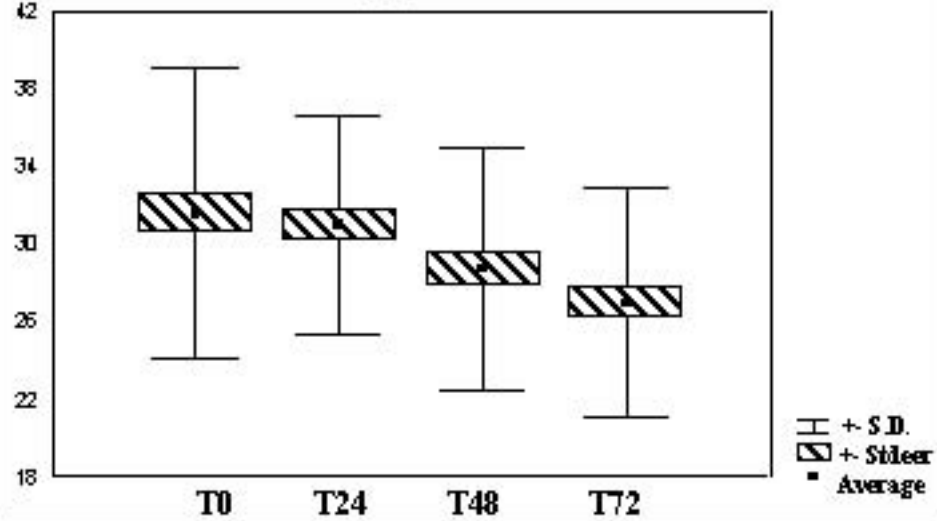

Supplement: MOESM3 [file 9635466]
